# Supplementary material for: Enhancing Seasonal Influenza Surveillance: Topic Analysis of Widely Used Medicinal Drugs Using Twitter Data
Source: PubMed Central journal article supplement (PMC5617904; doi:10.2196/jmir.7393), 2017-09-12
Supplement: jmir_v19i9e315_app2.pdf [file jmir_v19i9e315_app2.pdf]

Multimedia Appendix 2. Topics for tweets with drug mentions (raw).

<sup>w</sup> means the topic with the highest weight in the group

Table MA1. Dayquil/Nyquil topics (Beta = 0.34)

| Topic Number   | Alpha | Topic Compositions                                                                                                                                            | Interpretation |
|----------------|-------|---------------------------------------------------------------------------------------------------------------------------------------------------------------|----------------|
| 1              | 0.16  | feeling, living, working, knock, shot, made, stay, horrible, cold/flu, call, nasty, finally, thankful, celebrating, drinking, weak, prefer, pass, nose, times | unknown        |
| 2 <sup>w</sup> | 0.99  | flu, cold, sleep, time, sick, night, day, feel, symptoms, bed, soup,                                                                                          | uptake time    |
| 3              | 0.15  | eat, cycle, throat, pretty, work, due, medication, popped, z-pack, clears, coma, idea, hoping, barely, dosed, discontinued                                    | unknown        |
| 4              | 0.41  | flu, season, cold, top, learn, form, brittany, cough, aids, drops, works, knocked, tonight, watching, love, tissues, tea                                      | unknown        |
| 5              | 0.13  | shots, cold&flu, half, party, hard, sum, big, boss, talk, planned, poorly, capsule, grab, end, man, sounds, feeling, counter, gallon, marijuana               | unknown        |

Table MA2. Influenza virus vaccines topics (Beta = 0.05)

| Topic Number | Alpha | Topic Compositions                                                                                                            | Interpretation    |
|--------------|-------|-------------------------------------------------------------------------------------------------------------------------------|-------------------|
| 1            | 0.10  | mom, today, needles, doctor, nurse, gave, give, told, dad, baby, big, shot, giving, making, wanted, lady, sh*t, f*ck          | proponents        |
| 2            | 0.03  | reaction, hoping, sick, kids, allergic, eggs, made, egg, chicken, allergy, medicine, tea                                      | allergic reaction |
| 3            | 0.09  | flu, season, people, year, virus, immune, system, shot, epidemic, strain, stay, healthy, spreading, protect, remember         | reminders         |
| 4            | 0.04  | influenza, pregnant, risk, vaccination, national, recommend, women, immunity, free, safe                                      | risk              |
| 5            | 0.07  | free, health, today, clinic, center, giving, insurance, hospital, employees, students, tomorrow, student, public, appointment | unknown           |
| 6            | 0.11  | arm, sore, today, hurts, hurt, yesterday, damn,                                                                               | pain and          |

|                |      |                                                                                                                     |                       |
|----------------|------|---------------------------------------------------------------------------------------------------------------------|-----------------------|
|                |      | left, feels, side, bad, feel, stupid, throat, pain, ouch, killing, feeling, hurting                                 | distress              |
| 7 <sup>w</sup> | 0.31 | flu, sick, time, year, today, feel, good, hope, people, work, shot, cold, week, feeling, glad, day, years, thing    | unknown               |
| 8              | 0.07 | waiting, cvs, line, walgreens, pharmacy, free, wait, office, give, long, gave, spray, clinic, nasal, giving, people | queues<br>concerns    |
| 9              | 0.19 | sick, hate, shots, fuck, shit, flu, needles, damn, today, nervous                                                   | fear                  |
| 10             | 0.08 | Work, office, day, today, free, morning, tomorrow, doctors, doctor, shot, good, school                              | vaccination<br>places |

Table MA3. Theraflu topics (Beta = 0.28)

| Topic Number   | Alpha | Topic Compositions                                                                                                                                      | Interpretation       |
|----------------|-------|---------------------------------------------------------------------------------------------------------------------------------------------------------|----------------------|
| 1              | 0.23  | soup, chicken, noodle, juice, orange, care, flu, work, sleepy, warm, easier, food, drinkin, spicy, vodka                                                | natural flu remedies |
| 2              | 0.19  | told, chain, hoe, bad, flu, black, sprite, finna, selling, days, fuck, stay, asked, eating, powder, chainz, wack, talk, swear, cold&flu                 | unknown              |
| 3 <sup>w</sup> | 2.31  | flu, cold, sick, tea, drink, drinking, hot, good, night, time, bed, cough, sleep                                                                        | unknown              |
| 4              | 0.18  | kill, symptoms, life, cure, headache, nite, miss, wine, westnile, lord, great, suggest, cloud, tongue, thoughts, aches, trick, human, dying             | unknown              |
| 5              | 0.21  | girl, whiskey, shot, ill, discontinued, kids, embarrass, happy, fun, fluids, what's, kid, single, beat, money, wit, mixed, listening, awesome, cocktail | unknown              |

Table MA4. Oseltamivir topics (Beta = 0.96)

| Topic Number   | Alpha | Topic Compositions                                                                                                                                     | Interpretation       |
|----------------|-------|--------------------------------------------------------------------------------------------------------------------------------------------------------|----------------------|
| 1              | 1.20  | bed, influenza, day, reporting, kinda, make, sleep, works, found, onset, girl, find, call, gave, year, shortage, flu, tested, mentioning, disappointed | unknown              |
| 2 <sup>w</sup> | 5.52  | flu, symptoms, feel, day, doctor, prescription, made, meds, fever, taking, sick, prescribe,                                                            | prescription of drug |

|   |      |                                                                                                                                                          |         |
|---|------|----------------------------------------------------------------------------------------------------------------------------------------------------------|---------|
|   |      | effects                                                                                                                                                  |         |
| 3 | 1.30 | report, worse, asap, approved, give, body, coming, prescribed, medical, person, real, flu, cut, thought, surprises, short, dry, goodness, part, official | unknown |

Table MA5. Acetaminophen topics (Beta = 0.38)

| <b>Topic Number</b> | <b>Alpha</b> | <b>Topic Compositions</b>                                                                                                         | <b>Interpretation</b> |
|---------------------|--------------|-----------------------------------------------------------------------------------------------------------------------------------|-----------------------|
| 1                   | 0.73         | fever, throat, juice, recommend, drowsy, soup, temp, symptom, strep, spray, orange, tea                                           | natural flu remedies  |
| 2 <sup>w</sup>      | 4.08         | flu, cold, severe, night, lol, feel, time, cold/flu, feeling, shots, sick, shit, hope                                             | symptoms              |
| 3                   | 0.67         | pills, test, back, bad, high, stay, gonna, yup, full, cool, knock, guess, tomorrow, multi, crap, hate, pop, wanna, tweeting, duck | unknown               |

Table MA6. Vitamins topics (Beta = 0.22)

| <b>Topic Number</b> | <b>Alpha</b> | <b>Topic Compositions</b>                                                                                                                        | <b>Interpretation</b>         |
|---------------------|--------------|--------------------------------------------------------------------------------------------------------------------------------------------------|-------------------------------|
| 1 <sup>w</sup>      | 0.27         | flu, cold, sick, taking, lots, rest, drink, eat, immune, people, stay, feeling, good, healthy                                                    | preparedness through vitamins |
| 2                   | 0.17         | cold/flu, flu, fever, garlic, throat, tomorrow, stay, warm, hope, health, beat, kind, flu-like, thought, trust, doctor, flu/cold, hoping         | unknown                       |
| 3                   | 0.14         | flu, season, it's, plenty, remember, sunrise, tequila, avoid, loading, shot, makes, bad, damn, husband, drinking, refuse, extra, nasty, alrightt | unknown                       |
| 4                   | 0.08         | man, crazy, sniffles, fever, veggies, bad, safely, adding, living, germs, hear, extra, making, starting, foods                                   | unknown                       |
| 5                   | 0.09         | husband, sleep, duh, watch, apple, cayenne, shot, germs, fear, kiwi, mg, due, weather, careful, back, dr, fatty                                  | unknown                       |
